# Supplementary material
Source: Springer Nature journal article supplement (https://www.springermedizin.de/resource/supplementary/12873_2010_122_MOESM1_ESM.pdf/9431510)
Supplement: MOESM1 [file 9431510]

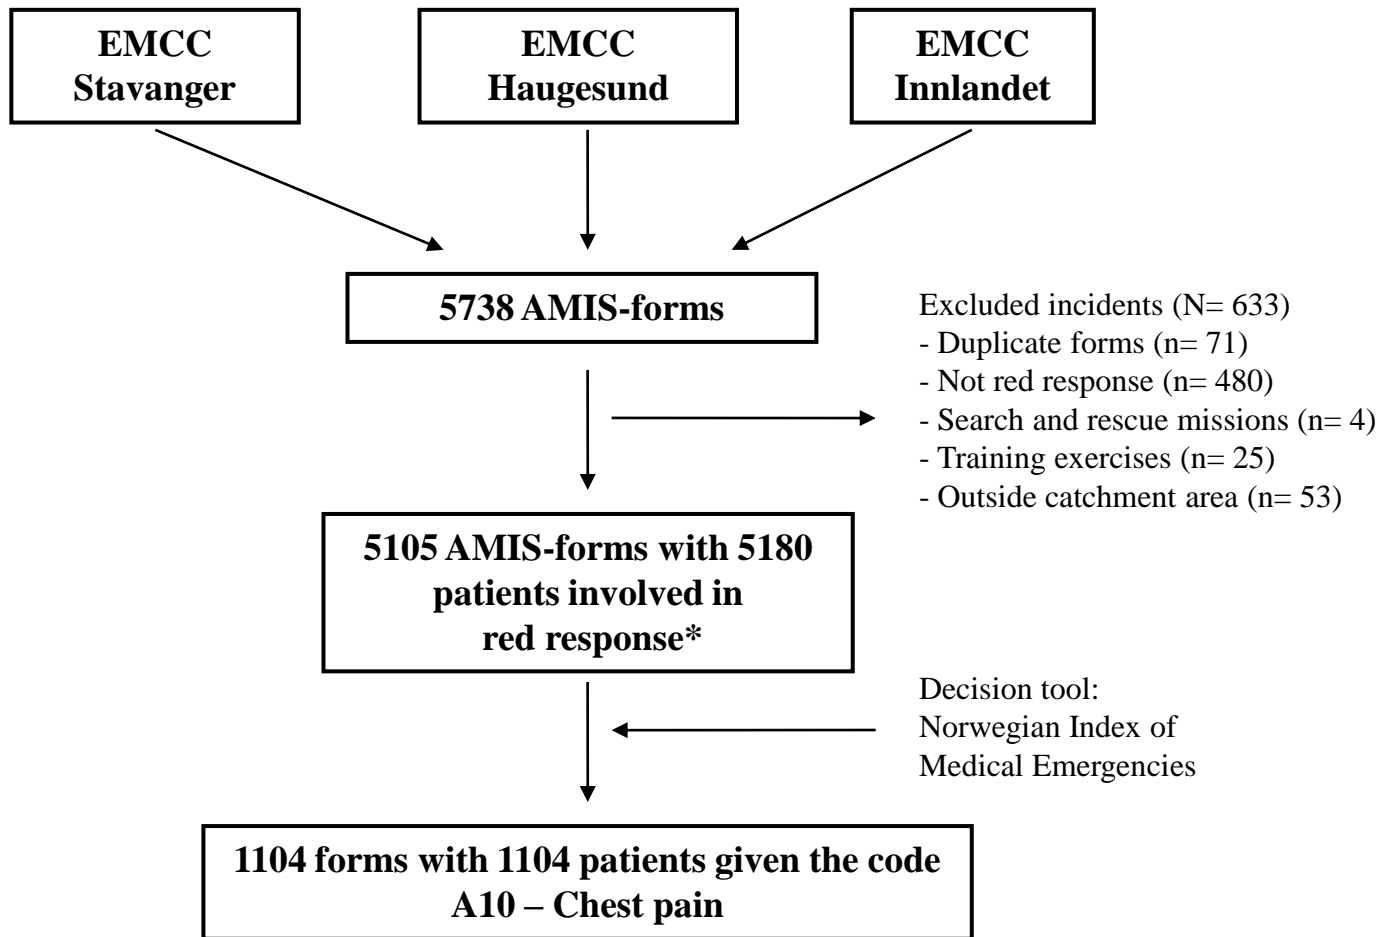

\* In the AMIS-form, each incident, *not* the individual patient, is registered. Some forms will accordingly contain more than one patient. All chest pain incidents included only one patient per AMIS-form, resulting in 1104 forms with 1104 patients.
